# Supplementary material
Source: PubMed Central journal article supplement (PMC2597640)
Supplement: NIHMS73800-supplement-supplementary_.pdf [file NIHMS73800-supplement-supplementary_.pdf]

Supporting Data

**Synthesis and photo-conversion of androsta- and pregna-5,7-dienes to vitamin D3-like derivatives.**

**Michal A. Zmijewski<sup>a</sup>, Wei Li<sup>b</sup>, Jordan K. Zjawiony<sup>c</sup>, Trevor W. Sweatman<sup>d</sup>, Jianjun Chen<sup>b</sup>, Duane D. Miller<sup>b</sup> and Andrzej T. Slominski<sup>a,\*</sup>**

<sup>a</sup>*Department of Pathology and Laboratory Medicine and the Center for Cancer Research, University of Tennessee Health Science Center, Memphis, TN 38163, USA*

<sup>b</sup>*Department of Pharmaceutical Sciences, College of Pharmacy, University of Tennessee Health Science Center, Memphis, TN 38163, USA*

<sup>c</sup>*Department of Pharmacognosy and National Center for Natural Products Research, Research Institute of Pharmaceutical Sciences, School of Pharmacy, University of Mississippi, University, MS 38677-1848, USA*

<sup>d</sup>*Department of Pharmacology and the Center for Cancer Research, University of Tennessee, Health Science Center, Memphis, TN 38163, USA*

**Contents:**

S2-S8 Figures S1-7

S9-S11 Tables S1-3

S12 Literature

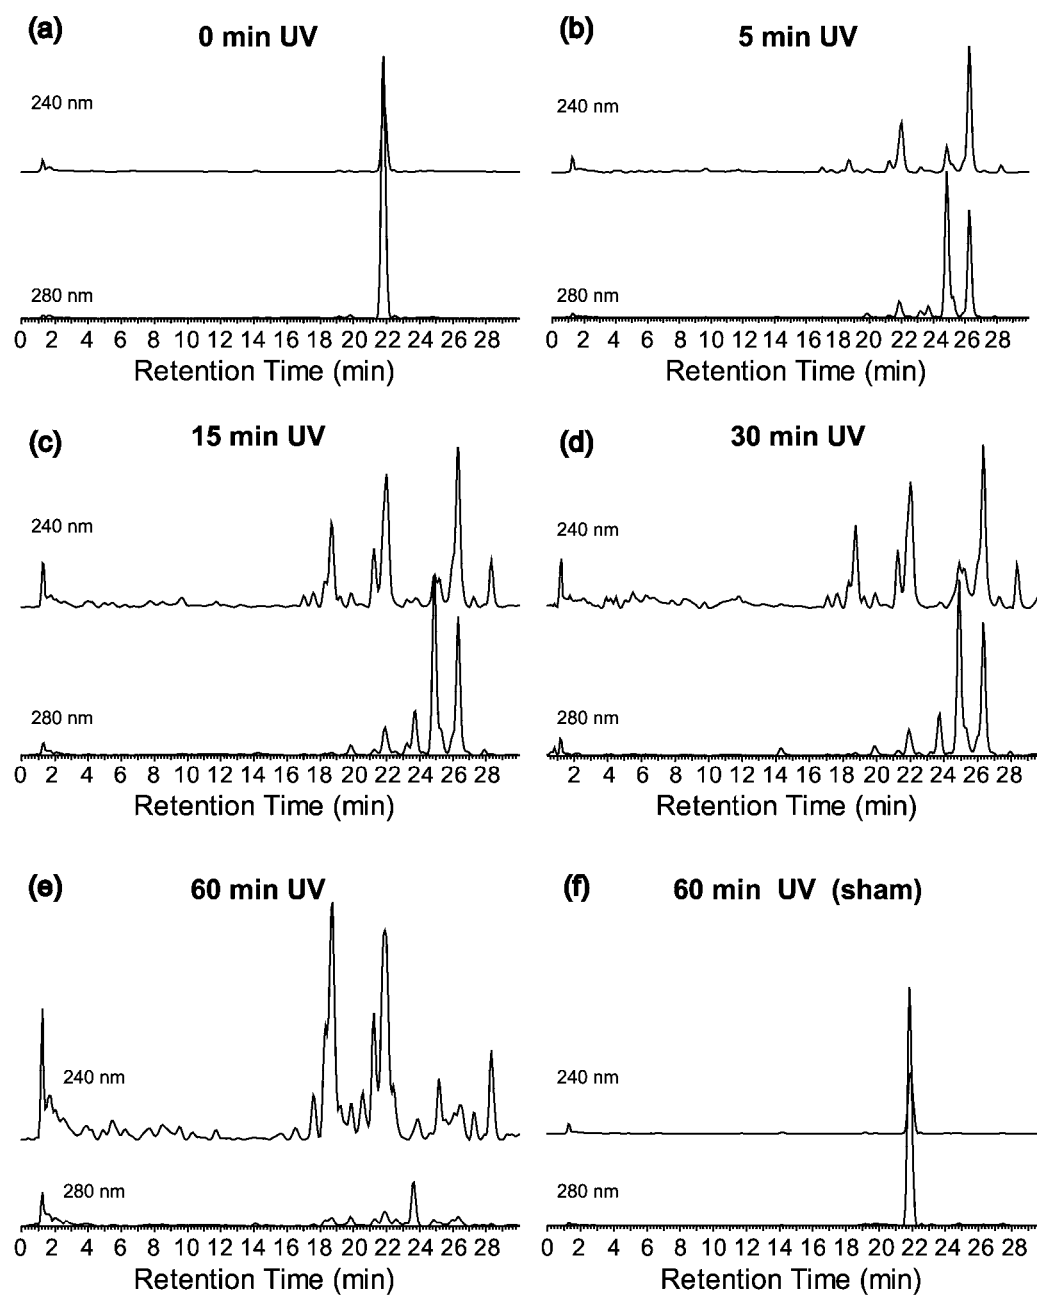

**Fig. S1.** UVB dose dependent photolysis of 3 $\beta$ -hydroxypregna-5,7-diene-20-one (**5c**).

RP-HPLC separation of **5c** irradiation products after treatment with UVB for 0 minutes (a), 5 (b), 15 (c), 30 (d), 60 (e). The sample was incubated in the dark, at room temperature (20°C) for 1 hour and subjected to RP-HPLC (f). Sham irradiation: (sham) the sample was covered with aluminum foil and subjected to UV for 60 min. The UV spectra for RP-HPLC were recorded at 240 nm (upper chromatogram) or 280 nm (lower chromatogram).

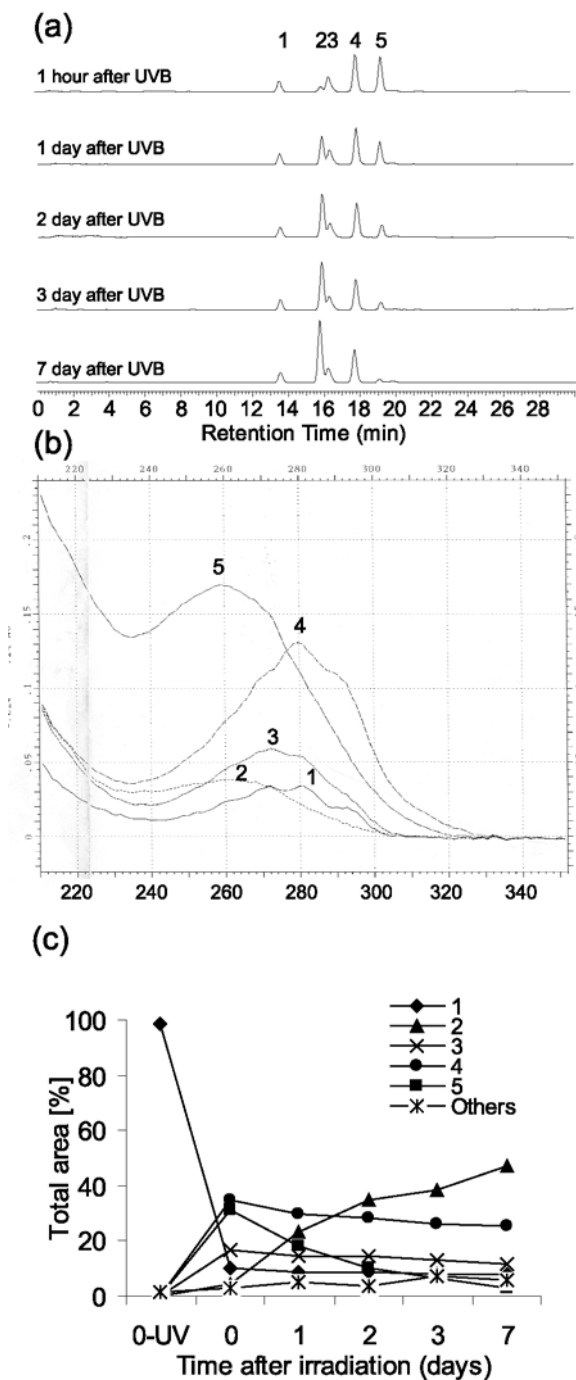

**Fig. S2.** UV- driven photolysis of 3 $\beta$ -hydroxyandrosta-5,7-diene (5b) and time dependent isomerization of products.

(a) RP-HPLC separation of 5b irradiation products after treatment with UVB for 15 minutes. The sample was incubated in the dark, at room temperature (20°C) for 1 hour or 1, 2, 3, or 7 days after irradiation. (b) Representative UV spectra of irradiated samples. (1 - **5b**, 2- **5b-D**, 3 - **5b-L**, 4 - **5b-T**, 5 - **5b-pD**). (c) The changes in relative amount of substrate and products during incubation after irradiation at 20°C. The changes are expressed as a ratio of total area under the selected peak to the total area of peaks in percent. The UV spectra for RP-HPLC (Panel a) were measured at 280 nm.

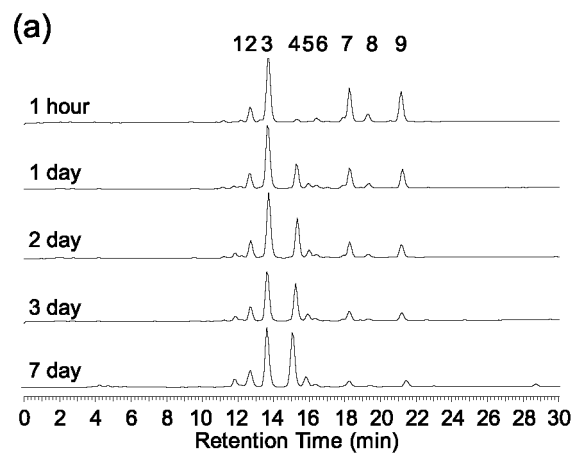

**Fig. S3.** The UV- driven photolysis of 3 $\beta$ ,17  $\beta$  -hydroxypregna-5,7-dien-20-one (**5a**) and time dependent isomerization of products.

(a) RF-HPLC separation of **5a** irradiation products after treatment with UVB for 15 minutes. The sample was incubated in the dark, at room temperature (20°C) for 1 hour or 1, 2, 3, or 7 days after irradiation. (b) Representative UV spectra of irradiated samples. (1 - **5a-iT**, 2- **5a**, 3- **5a-D**, 4 - **5a-L**, 7 - **5a-T**, 9 - **5a-pD**). (c) The changes in relative amount of substrate and products during incubation after irradiation at 20°C. The changes are expressed as a ratio of total area under the selected peak to the total area of peaks in percent. The UV spectra for RP-HPLC (Panel a) were measured at 280 nm.

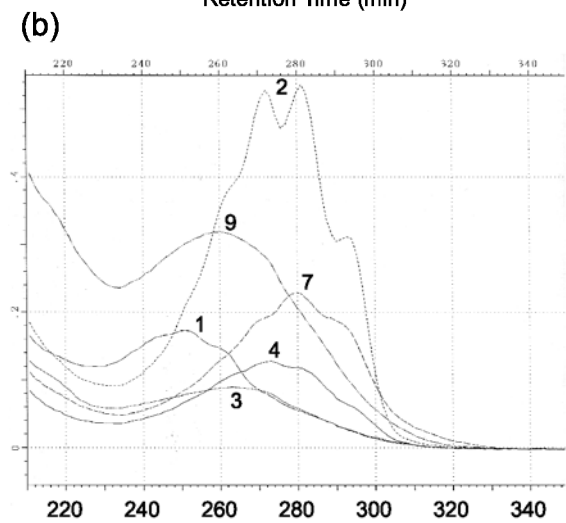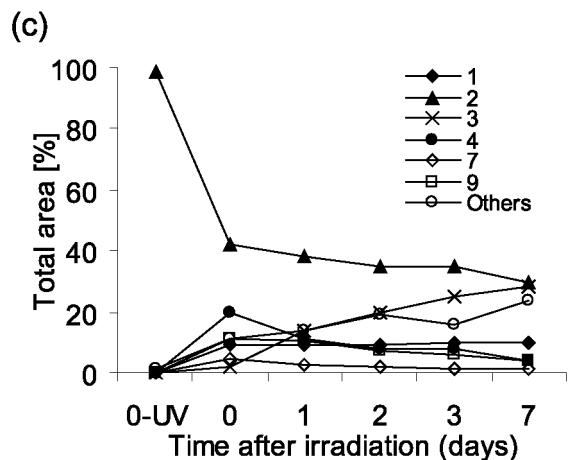

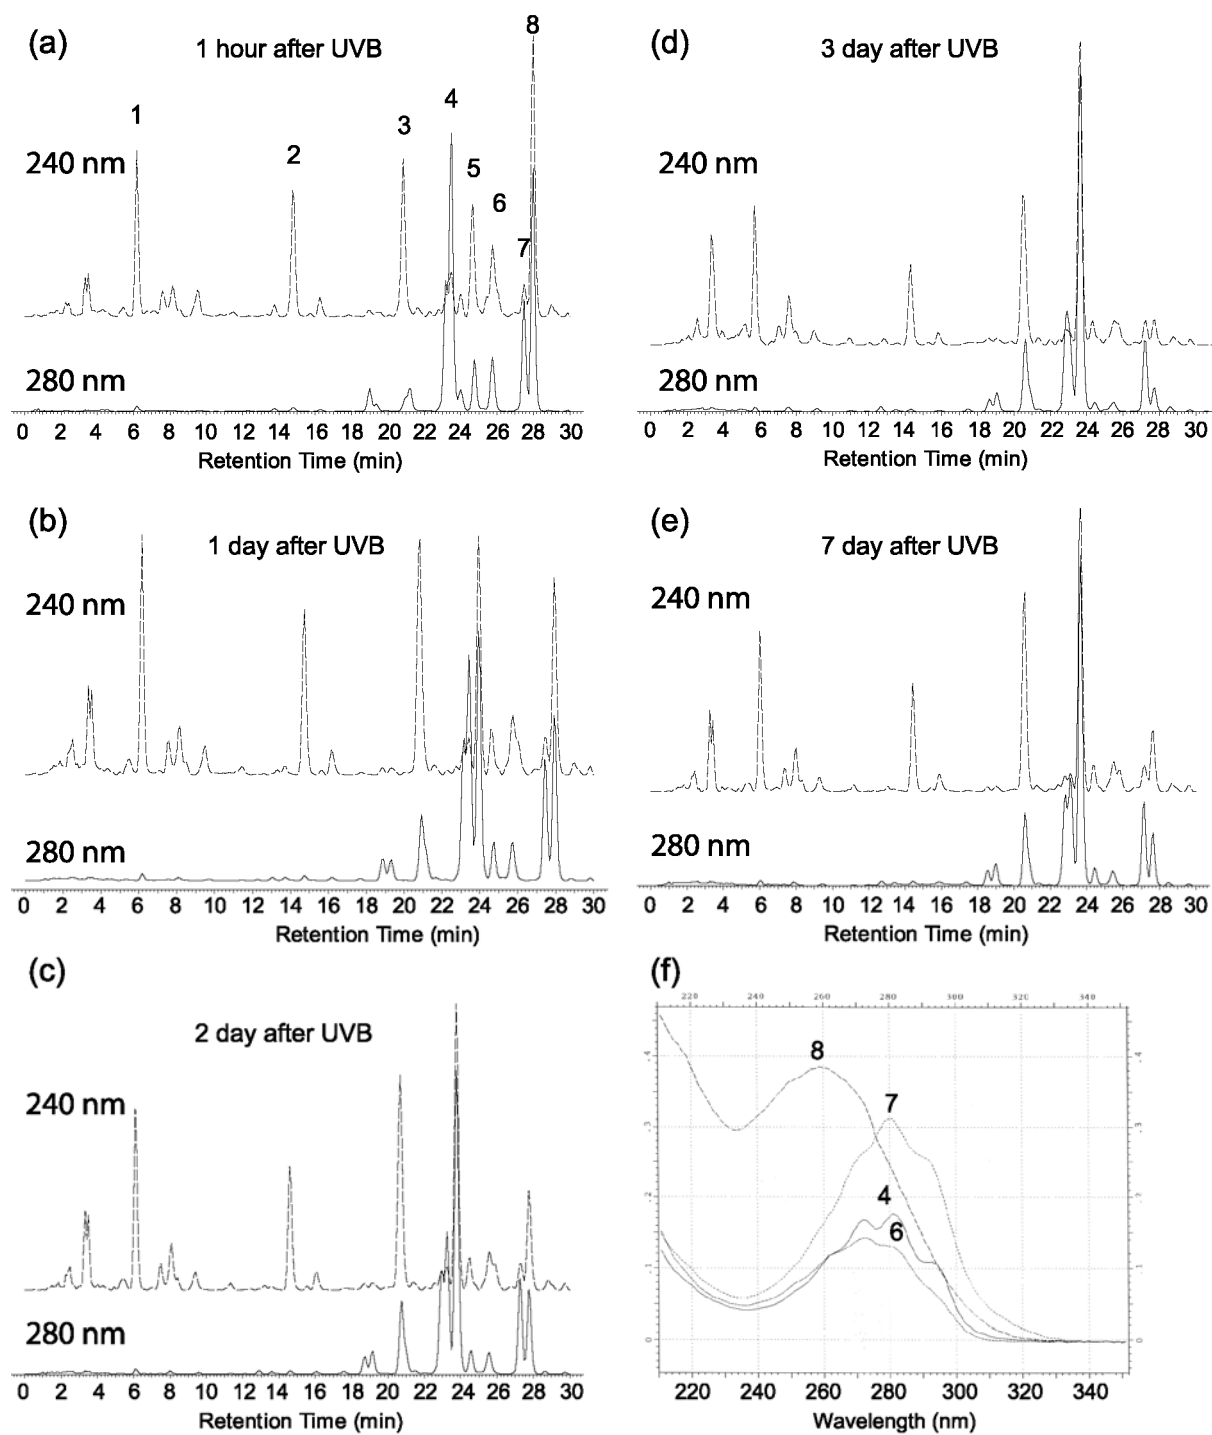

**Fig. S4.** UVB driven photolysis of 3β,20-dihydroxypregna-5,7-diene (4b).

(a) RP-HPLC separation of **4a** irradiation products after treatment with UVB for 15 minutes and incubation for 1 hour (a), 1 (b), 2 (c), 3 (d) and 7 (e) days in the dark, at room temperature (20°C). (b) Representative UV spectra of irradiated samples. (4 – **4b**, 6- **4b-L**, 7 – **4b-T**, 8 – **4b-pD**). The UV spectra for RP-HPLC (Panel a-e) were measured at 240 nm upper trace and 280 lower trace.

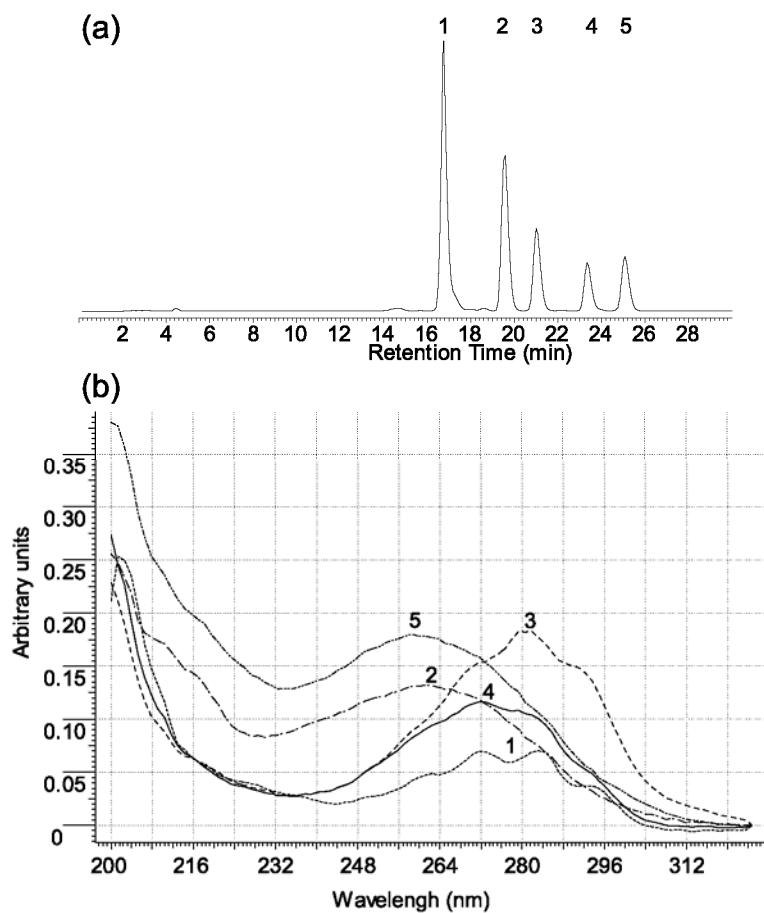

**Fig. S5.** UVB- driven photolysis of 3 $\beta$ ,17-dihydroxyandrosta-5,7-diene (**4a**).

(a) RP-HPLC separation of **4a** irradiation products after treatment with UVB for 15 minutes and incubation for 4 days in the dark, at room temperature (20°C).  
(b) Representative UV spectra of irradiated samples. (1 – **4a**, 2- **4a-D**, 3 - **4a-T**, 4 – **4a-L**, 5 – **4a-pD**). The UV spectra for RP-HPLC (Panel a) were measured at 280 nm.

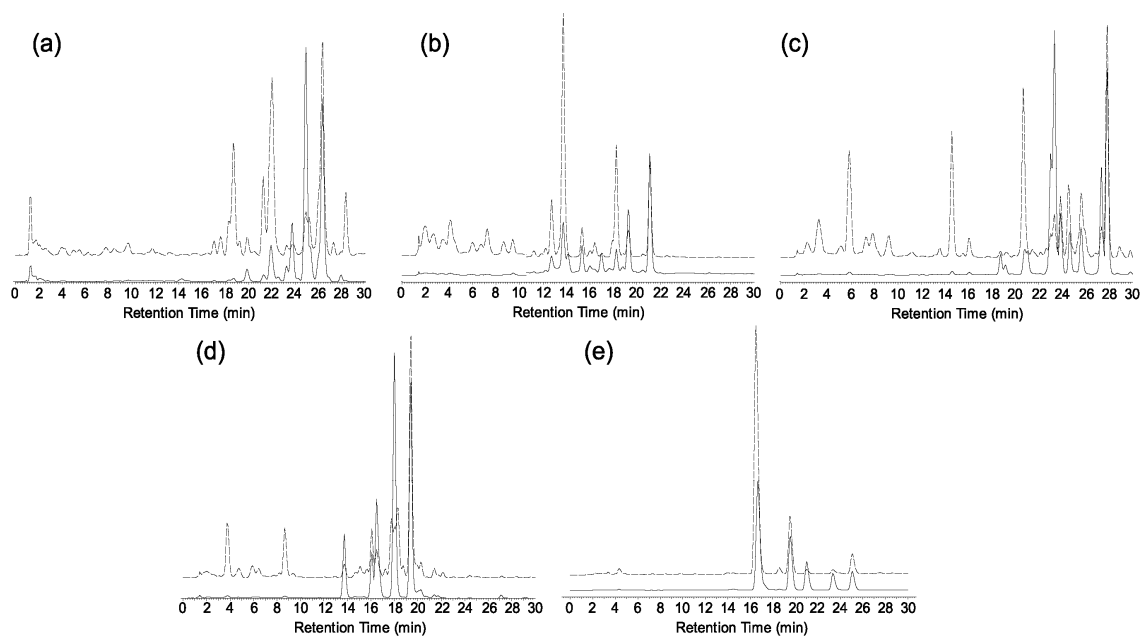

**Fig.S6.** Comparison of UVB- driven photolysis of androsta- and pregna-5,7-dienes.

RP-HPLC separation of **5c** (a), **5a** (b), **4b** (c), **5b** (d) and **4a** (e) irradiation products after treatment with UVB for 15 minutes. The UV spectra for RF-HPLC (Panel a-e) were measured at 240 nm upper trace and 280 lower trace.

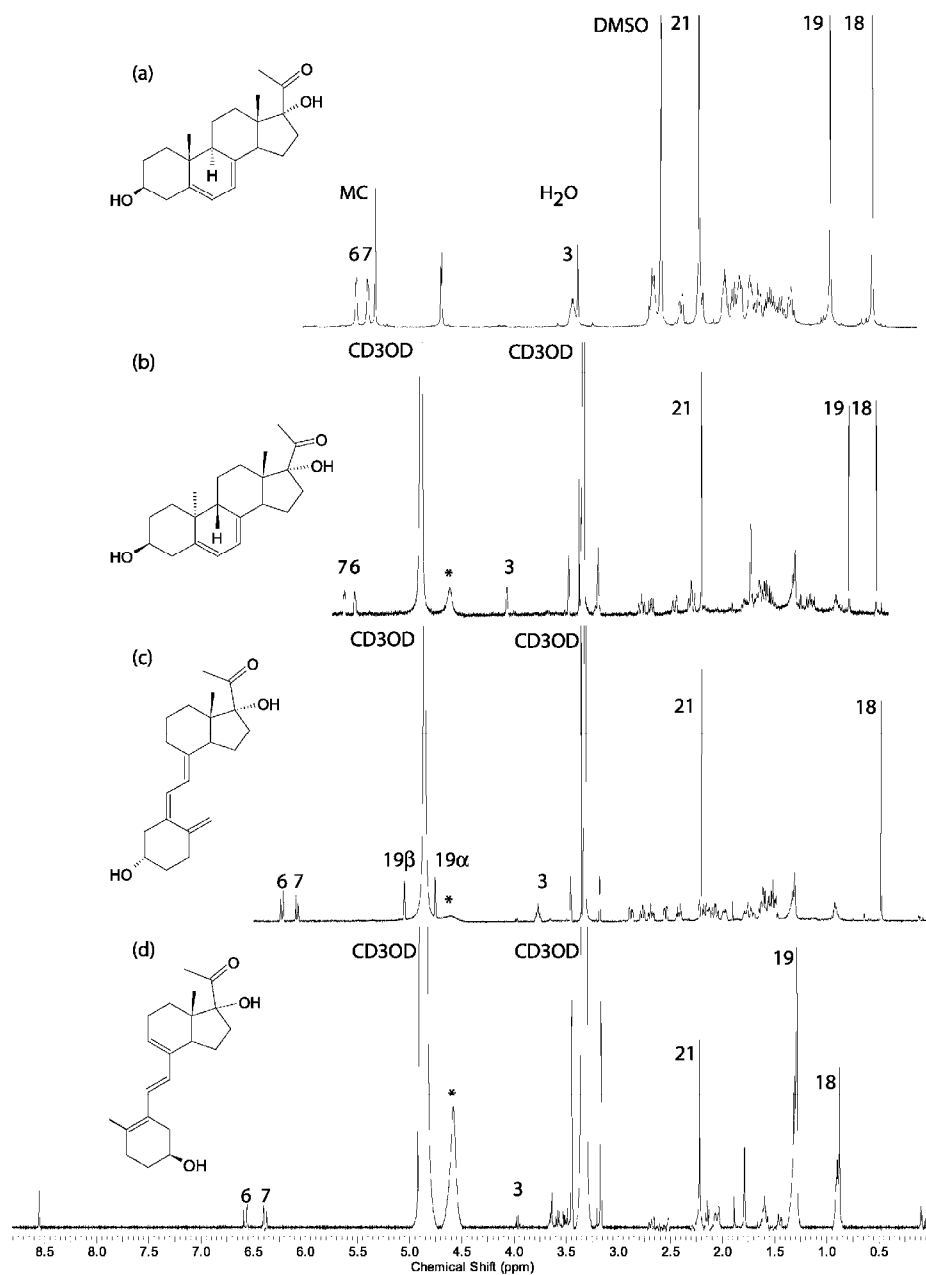

**Fig. S7.** Proton NMR spectra of androsta- and pregna-5,7-dienes and main products of their irradiation with **5a** as an example.

(a) 3 $\beta$ ,17 $\alpha$ -dihydroxypregna-5,7-dien-20-one (**5a**), (b) 3 $\beta$ ,17 $\alpha$ -dihydroxy-9 $\beta$ ,10 $\alpha$ -pregna-5,7-dien-20-one (**5a-L**) (c) 5*Z*,7*E*-3 $\beta$ ,17 $\alpha$ -dihydroxy-9,10-secopregna-5,7,10(19)trien-20-one (**5a-D**) (d) 6*E*-3 $\beta$ ,17 $\alpha$ -dihydroxy-9,10-secopregna-5(10),6,8-trien-20-one (**5a-T**). The main peaks used for structural identification of compounds are marked by number of carbon. Impurities and solvents are described or marked with a star (\*).



Short side-chain 5,7-dienes and their D-like derivatives

**Table S1.** <sup>1</sup>H NMR chemical shifts of steroidal-5,7-dienes

| Solvent               | CDCl <sub>3</sub><br><b>3c</b> | CDCl <sub>3</sub><br><b>5c</b> | CDCl <sub>3</sub><br><b>5a</b> | CDCl <sub>3</sub><br><b>4b</b> | CDCl <sub>3</sub><br><b>5b</b> | CD <sub>3</sub> OD<br><b>4a</b> |
|-----------------------|--------------------------------|--------------------------------|--------------------------------|--------------------------------|--------------------------------|---------------------------------|
| 1 CH <sub>2</sub>     | α 1.337<br>β 1.89              | α 1.31<br>β 1.90               | α 1.31*<br>β 1.90*             | α 1.31*<br>β 1.90              | α 1.38<br>β 1.91               | α 1.28<br>β 1.83                |
| 2 CH <sub>2</sub>     | α 1.942<br>β 1.583             | α 1.92<br>β 1.54               | α 1.92*<br>β 1.54*             | α 1.92<br>β 1.54*              | α 1.94<br>β 1.52               | α 1.8-2.20<br>β 1.46            |
| 3 CH                  | 4.71                           | 3.65                           | 3.64                           | 3.64                           | 3.66                           | 3.51                            |
| 4 CH <sub>2</sub>     | α 2.51<br>β 2.364              | α 2.48<br>β 2.31               | 2.48<br>2.31                   | α 2.41<br>β 2.29               | α 2.51<br>β 2.31               | α 2.41<br>β 2.24                |
| 6 CH                  | 5.58                           | 5.58                           | 5.58                           | 5.58                           | 5.63                           | 5.55                            |
| 7 CH                  | 5.42                           | 5.43                           | 5.45                           | 5.42                           | 5.56                           | 5.37                            |
| 9 CH                  | 2.03                           | 2.02                           | 2.02*                          | 2.02*                          | 2.07                           | 1.91                            |
| 11 CH <sub>2</sub>    | α 1.712<br>β 1.788             | α 1.7<br>β 1.7                 | α 1.7*<br>β 1.7*               | α 1.7-1.8<br>β 1.7-1.8         | α 1.75<br>β 1.75               | α 1.68<br>β 1.68                |
| 12 CH <sub>2</sub>    | α 1.518<br>β 2.114             | α 1.49<br>β 2.12               | α 1.49*<br>β 2.12*             | α 1.49*<br>β 2.18              | α 1.37<br>β 1.94               | α 1.18<br>β 1.8-2.0             |
| 14 CH                 | 2.047                          | 2.05                           | 2.05                           | 2.05                           | 2.2                            | 1.8-2.0                         |
| 15 CH <sub>2</sub>    | α 1.827<br>β 1.543             | α 1.82<br>β 1.51               | α 1.82*<br>β 1.51*             | α 1.82*<br>β 1.51*             | α 2.1<br>β 1.79                | α 1.8-2.0<br>β 1.72             |
| 16 CH <sub>2</sub>    | α 1.765<br>β 2.21              | α 1.76<br>β 2.22               | α 2.61<br>2.70                 | α 1.76*<br>β 2.22*             | α 2.20<br>β 2.54               | α 1.55<br>β 1.8-2.0             |
| 17 CH                 | 2.632                          | 2.63                           | C                              | 2.17                           | C                              | 3.69                            |
| 18 CH <sub>3</sub>    | 0.582                          | 0.58                           | 0.69                           | 0.77                           | 0.83                           | 0.68                            |
| 19 CH <sub>3</sub>    | 0.947                          | 0.95                           | 0.78                           | 0.7                            | 0.98                           | 0.96                            |
| 20 C                  |                                |                                |                                | 3.75 CH                        |                                |                                 |
| 21 CH <sub>3</sub>    | 2.148                          | 2.16                           | 2.29                           | 1.17                           |                                |                                 |
| 3β-Ac CH <sub>3</sub> | 2.044                          |                                |                                |                                |                                |                                 |

\* Chemical shifts based on similar structures presented in this manuscript or previously published data.<sup>1</sup>

*Short side-chain 5,7-dienes and their D-like derivatives*

Table S2. <sup>13</sup>C and <sup>1</sup>H NMR chemical shifts of vitamin D-like compounds and T-like (5aD) compound.

|                    | <sup>13</sup> C 5c-D | <sup>13</sup> C 4a-D | <sup>1</sup> H 5c-D | <sup>1</sup> H 5a-D | <sup>1</sup> H 5a-T         | <sup>1</sup> H 4b-D | <sup>1</sup> H 5b-D | <sup>1</sup> H 4a-D |
|--------------------|----------------------|----------------------|---------------------|---------------------|-----------------------------|---------------------|---------------------|---------------------|
| 1 CH <sub>2</sub>  | 23.12                | 33.333               | α 2.12<br>β 2.41    | α 2.11<br>β 2.41    | α 2.11*<br>β 2.41*          | α 2.11<br>β 2.41    | α 2.17<br>β 2.42    | α 2.12<br>β 2.41    |
| 2 CH <sub>2</sub>  | 35.5                 | 36.372               | α 1.93<br>β 1.68    | α 1.97<br>β 1.68    | α 1.97*<br>β 1.68*          | α 1.97<br>β 1.54    | α 1.97*<br>β 1.54*  | α 1.97<br>β 1.54    |
| 3 CH -OH           | 69.99                | 70.345               | 3.96                | 3.76                | 3.86                        | 3.76                | 3.8                 | 3.77                |
| 4 CH <sub>2</sub>  | 46.5                 | 46.806               | α 2.58<br>β 2.30    | α 2.53<br>β 2.19    | α 2.53*<br>β 2.19*          | α 2.55<br>β 2.20    | α 2.59<br>β 2.24    | α 2.54<br>β 2.19    |
| 6 CH               | 122.2                | 122.282              | 6.22                | 6.23                | 6.58                        | 6.22                | 6.27                | 6.23                |
| 7 CH               | 118.98               | 118.73               | 6.06                | 6.08                | 6.39                        | 6.02                | 6.19                | 6.04                |
| 9 CH <sub>2</sub>  | 29.05                | 29.573               | 2.85<br>1.72        | 2.87<br>1.5         | CH 5.35                     | 2.87<br>1.56        | 2.94<br>1.67*       | 2.89<br>1.67        |
| 11 CH <sub>2</sub> | 23.3                 | 23.938               | α 1.77<br>β 1.77    | α 1.75<br>β 1.75    | α 1.75*<br>β 1.75*          | α 1.68<br>β 1.67    | α 1.71*<br>β 1.53*  | α 1.71<br>β 1.53    |
| 12 CH <sub>2</sub> | 39.75                | 38.457               | α 1.56<br>β 2.05    | α 1.50<br>β 2.06    | α 1.50*<br>β 2.06           | α 1.34<br>β 1.52    | α 1.24*<br>β 1.86*  | α 1.24<br>β 1.86    |
| 14 CH              | 56.7                 | 51.882               | 2.12                | 2.14                | 2.14*                       | 2.02                | β 2.47              | β 1.99              |
| 15 CH <sub>2</sub> | 22.46                | 22.045               | α 1.61<br>β 1.61    | α 1.6<br>β 1.6      | α 1.6*<br>β 1.6*            | α 1.50<br>β 1.50    | α 1.45*<br>β 1.64*  | α 1.45<br>β 1.64    |
| 16 CH <sub>2</sub> | 22.61                | 29.979               | α 1.7<br>β 2.17     | α 1.68<br>β 2.76    | α 1.68*<br>β 2.76*          | α 1.63<br>β 2.17    | α 1.46*<br>β 2.47   | α 1.46<br>β 2.06    |
| 17 CH              | 64.25                | 82.799               | 2.7                 | N/A                 | N/A                         | 1.51                | N/A                 | 3.74                |
| 18 CH <sub>3</sub> | 13.04                | 11.348               | 0.51                | 0.46                | 0.883                       | 0.61                | 0.75                | 0.58                |
| 19 CH <sub>2</sub> | 113.7                | 112.492              | α 4.81<br>β 5.06    | α 4.75<br>β 5.05    | CH <sub>3</sub> 1.79<br>N/A | α 4.74<br>β 5.04    | 4.82<br>5.1         | 4.75<br>5.04        |
| 20 C               | ND                   | ND                   | N/A                 | N/A                 | ND                          | 3.62                | N/A                 | N/A                 |
| 21-CH <sub>3</sub> | 31.47                |                      | 2.143               | 2.223               | 2.23                        | 1.12                | N/A                 | N/A                 |

\* Chemical shifts based on similar structures.

ND – Not determined

N/A – Not applicable (ternary carbons)

*Short side-chain 5,7-dienes and their D-like derivatives*

**Table S3.** <sup>1</sup>H NMR chemical shifts of L-like compounds

|                    | <b>5a-L</b> | <b>4b-L</b> | <b>4a-L</b> |
|--------------------|-------------|-------------|-------------|
| 1 CH <sub>2</sub>  | α 1.31*     | α 1.31*     | α 1.296     |
|                    | β 1.90*     | β 1.90*     | β 1.771     |
| 2 CH <sub>2</sub>  | α 1.92*     | α 1.92*     | α 1.711     |
|                    | β 1.54*     | β 1.54*     | β 1.616     |
| 3 CH               | 4.03        | 4.03        | 4.033       |
| 4 CH <sub>2</sub>  | α 2.44      | α 2.44      | α 2.43      |
|                    | β 2.28      | β 2.35      | β 2.264     |
| 6 CH               | 5.584       | 5.57        | 5.423       |
| 7 CH               | 5.488       | 5.42        | 5.58        |
| 9 CH               | 2.02*       | 2.02*       | 2.34        |
| 11 CH <sub>2</sub> | α 1.7-1.8*  | α 1.7-1.8*  | α 1.49      |
|                    | β 1.7-1.8*  | β 1.7-1.8*  | β 1.49      |
| 12 CH <sub>2</sub> | α 1.49*     | α 1.49*     | α 1.51      |
|                    | β 2.18*     | β 2.18*     | β 1.91      |
| 14 CH              | 2.05*       | 2.05*       | 2.48        |
| 15 CH <sub>2</sub> | α 1.82*     | α 1.82*     | α 1.667     |
|                    | β 1.51*     | β 1.51*     | β 1.575     |
| 16 CH <sub>2</sub> | α 2.68      | α 1.76*     | α 1.501     |
|                    | β 2.76      | β 2.22*     | β 2.083     |
| 17 CH              | N/A         | 2.17*       | 3.833       |
| 18 CH <sub>3</sub> | 0.517       | 0.77        | 0.691       |
| 19 CH <sub>3</sub> | 0.777       | 0.7         | 0.754       |
| 20 C               | N/A         | 3.65 CH     |             |
| 21 CH <sub>3</sub> | 2.183       | 1.13        |             |

\* Chemical shifts based on similar structures

ND – Not determined

N/A – Not applicable (ternary carbons)

*Short side-chain 5,7-dienes and their D-like derivatives*

1. A. U. Siddiqui, W. K. Wilson, S. Swaminathan and G. J. Schroepfer, Jr., Efficient preparation of steroidal 5,7-dienes of high purity, *Chemistry and physics of lipids*, 1992, **63**, 115-129.
